# Supplementary material
Source: PubMed Central journal article supplement (PMC7990751)
Supplement: 41999_2020_414_MOESM3_ESM.pdf [file 41999_2020_414_MOESM3_ESM.pdf]

### Online Resource 3: AXIS Appraisal

**Title:** Physical activity in Acutely Ill Older Adults: Hospital At Home Vs Hospital Inpatient Care Settings – A Systematic Review

**Authors:** Jennifer Scott, Ukachukwu O Abaraogu, Graham Ellis, Maria Giné-Garriga, Dawn A Skelton

**Corresponding Author:** Jennifer Scott, [jennifer.scott@gcu.ac.uk](mailto:jennifer.scott@gcu.ac.uk), ORCID <https://orcid.org/0000-0002-1481-4270>, Centre for Living, School of Health and Life Sciences, Glasgow Caledonian University, Glasgow, United Kingdom

## AXIS Quality and Risk of Bias Assessment

To facilitate the assessment risk of bias for each study as well as the literature included as a whole, the appraisal has been split into two sections: appraisal of quality of included studies (Table 4) and appraisal of the Risk of Bias across included studies (Table 5).

**Table 1: AXIS Appraisal Results – Quality of Studies**

| Domain       | Axis Question                                                                                                                            | Belala et al, 2019 | Brown et al, 2006 | Evenson et al, 2017 | Fisher et al, 2016 | Floegel et al, 2018 | Karlsen et al, 2017 | Lim et al, 2018 | McCullagh et al, 2016 | Ostir et al, 2012 | Pedersen et al, 2012 | Pitta et al, 2006 | Rowlands et al, 2014 | Salis et al, 2015 | Ueda et al, 2016 | Valkenet et al, 2018 | Villumsen et al, 2011 |
|--------------|------------------------------------------------------------------------------------------------------------------------------------------|--------------------|-------------------|---------------------|--------------------|---------------------|---------------------|-----------------|-----------------------|-------------------|----------------------|-------------------|----------------------|-------------------|------------------|----------------------|-----------------------|
| Reporting    | Were the aims/objectives of the study clear?                                                                                             | +                  | +                 | +                   | +                  | +                   | +                   | +               | +                     | +                 | +                    | +                 | +                    | +                 | +                | +                    | +                     |
| Study Design | Was the study design appropriate for the stated aim(s)?                                                                                  | +                  | +                 | +                   | +                  | +                   | +                   | +               | +                     | +                 | +                    | +                 | +                    | +                 | +                | +                    | +                     |
| Study Design | Was the sample size justified?                                                                                                           | -                  | -                 | -                   | -                  | -                   | +                   | -               | -                     | -                 | -                    | +                 | -                    | -                 | +                | -                    | +                     |
| Reporting    | Was the target/reference population clearly defined?                                                                                     | +                  | +                 | +                   | +                  | +                   | +                   | +               | +                     | +                 | +                    | +                 | +                    | +                 | +                | ?                    | +                     |
| Study Design | Was the sample frame taken from an appropriate population base so that it closely represented the target population under investigation? | +                  | +                 | +                   | +                  | +                   | +                   | +               | +                     | +                 | +                    | +                 | +                    | +                 | +                | +                    | +                     |
| Study Design | Were the risk factors and outcome variables measured appropriate to the aims of the study?                                               | +                  | +                 | +                   | +                  | +                   | +                   | +               | +                     | +                 | +                    | +                 | +                    | +                 | +                | +                    | +                     |
| Reporting    | Is it clear what was used to determine statistical significance and/or precision estimates?                                              | +                  | +                 | +                   | +                  | +                   | +                   | +               | +                     | +                 | +                    | +                 | +                    | +                 | +                | +                    | +                     |
| Reporting    | Were the methods (including statistical methods) sufficiently described to enable them to be repeated?                                   | +                  | +                 | +                   | +                  | +                   | +                   | +               | +                     | +                 | +                    | +                 | +                    | +                 | ?                | +                    | +                     |
| Reporting    | Were the basic data adequately described?                                                                                                | +                  | +                 | +                   | +                  | +                   | +                   | +               | ?                     | +                 | +                    | +                 | +                    | +                 | +                | +                    | +                     |
| Reporting    | Were the results presented for all the analyses described in the methods?                                                                | +                  | +                 | +                   | +                  | +                   | +                   | +               | +                     | +                 | +                    | +                 | +                    | +                 | +                | +                    | +                     |
| Study Design | Were the authors discussions and conclusions justified by the results?                                                                   | ?                  | +                 | +                   | +                  | +                   | +                   | +               | +                     | +                 | +                    | +                 | +                    | +                 | +                | +                    | +                     |
| Reporting    | Were the limitations of the study discussed?                                                                                             | +                  | ?                 | +                   | +                  | +                   | +                   | +               | +                     | +                 | +                    | +                 | +                    | +                 | +                | +                    | +                     |
| Study Design | Were there any funding sources or conflicts of interest that may affect the author's interpretation of the results?                      | +                  | +                 | +                   | ?                  | +                   | +                   | +               | +                     | +                 | ?                    | ?                 | +                    | +                 | +                | +                    | ?                     |
| Study Design | Was ethical approval or consent of participants attained?                                                                                | +                  | ?                 | +                   | ?                  | ?                   | ?                   | +               | +                     | ?                 | +                    | +                 | +                    | ?                 | +                | +                    | +                     |

Key: + = Yes, - = No, ? = Unclear/Not reported

**Table 2: AXIS Appraisal Results – Risk of Bias**

| Domain          | Axis Question                                                                                                                                         | Belala et al, 2010 | Brown et al, 2000 | Evenson et al, 2017 | Fisher et al, 2016 | Floegel et al, 2010 | Karlsen et al, 2017 | Lim et al, 2010 | McCullagh et al, 2016 | Ostir et al, 2012 | Pedersen et al, 2013 | Pitta et al, 2006 | Rowlands et al, 2014 | Salis et al, 2015 | Ueda et al, 2016 | Valkenet et al, 2010 | Vilumsen et al, 2011 |
|-----------------|-------------------------------------------------------------------------------------------------------------------------------------------------------|--------------------|-------------------|---------------------|--------------------|---------------------|---------------------|-----------------|-----------------------|-------------------|----------------------|-------------------|----------------------|-------------------|------------------|----------------------|----------------------|
| Selection       | Was the selection process likely to select subjects/participants that were representative of the target population under investigation?               | +                  | +                 | +                   | +                  | +                   | +                   | +               | +                     | +                 | +                    | +                 | +                    | +                 | +                | +                    | +                    |
| Selection       | Were measures taken to address and categorise non responders?                                                                                         | -                  | -                 | +                   | -                  | +                   | ?                   | -               | -                     | -                 | -                    | -                 | -                    | -                 | -                | -                    | -                    |
| Instrumentation | Were the risk factor and outcome variables measured correctly using instruments/measurements that had been trialled, piloted or published previously? | +                  | +                 | +                   | +                  | +                   | +                   | +               | +                     | +                 | +                    | +                 | +                    | +                 | -                | +                    | +                    |
| Selection       | Does the response rate raise concerns about non-response bias (Response rate <80%, Yu and Tse, 2012)                                                  | +                  | -                 | +                   | -                  | -                   | -                   | -               | +                     | +                 | -                    | -                 | -                    | -                 | -                | -                    | -                    |
| Selection       | If appropriate, was information about non-responders described?                                                                                       | +                  | -                 | +                   | -                  | +                   | -                   | -               | -                     | -                 | -                    | -                 | -                    | -                 | -                | -                    | -                    |
| Reporting       | Were the results internally consistent?                                                                                                               | +                  | +                 | +                   | +                  | ?                   | +                   | +               | +                     | +                 | ?                    | +                 | +                    | +                 | +                | +                    | +                    |

Key: + = Low risk of bias, - = high risk of bias, ? = Some concerns
